# Supplementary material
Source: PubMed Central journal article supplement (PMC3242926)
Supplement: NIHMS320057-supplement-01.pdf [file NIHMS320057-supplement-01.pdf]

SUPPLEMENTAL TABLE 1

**Table 1**

Supplementary Table 1: Experimental evidence for regulatory connections in the T-cell gene regulatory network. Confidence levels for regulatory interaction are given as follows: 1 – Evidence in non-T cells only; 2 – Evidence from gene perturbation in T-cell progenitors alone, or from cis-regulatory analysis in T-cell progenitors alone; 3 – Evidence from gene perturbation in T-cell progenitors and cis-regulatory analysis. P – post-transcriptional regulatory interaction. FL – fetal liver, BM – bone marrow. Cited references are given in the main text.

| Source             | Sign | Target          | Level | Experiment                                                                                                                             | Cell Type                                                                                                                         | Reference        |
|--------------------|------|-----------------|-------|----------------------------------------------------------------------------------------------------------------------------------------|-----------------------------------------------------------------------------------------------------------------------------------|------------------|
| Bcl11b             | +    | CD3e            | 2     | Bcl11b over-expression + <i>in vitro</i> T-cell culture + mRNA analysis                                                                | Bcl11b <sup>-/-</sup> FL Lin-Sca1+Kit <sup>+</sup> (LSK)                                                                          | [28]             |
| Bcl11b             | -    | CEBPa           | 2     | Bcl11b over-expression + <i>in vitro</i> T-cell culture + mRNA analysis                                                                | Bcl11b <sup>-/-</sup> FL Lin-Sca1+Kit <sup>+</sup> (LSK)                                                                          | [28]             |
| Bcl11b             | -    | Id2             | 1     | mRNA expression profiling<br>Chip-seq using Bcl11b antibody                                                                            | Bcl11b <sup>-/-</sup> double positive thymocytes                                                                                  | [52]             |
| Bcl11b             | -    | Kit             | 2     | Bcl11b over-expression + <i>in vitro</i> T-cell culture + surface expression analysis using flow cytometry                             | Bcl11b <sup>-/-</sup> FL Lin-Sca1+Kit <sup>+</sup> (LSK)                                                                          | [28]             |
| Bcl11b             | +    | pTa             | 2     | Bcl11b over-expression + <i>in vitro</i> T-cell culture + mRNA analysis                                                                | FL Lin-Sca1+Kit <sup>+</sup> (LSK) cells                                                                                          | [28]             |
| Bcl11b             | -    | PU.1            | 2     | Bcl11b over-expression + <i>in vitro</i> T-cell culture + mRNA analysis                                                                | FL Lin-Sca1+Kit <sup>+</sup> (LSK) cells                                                                                          | [28]             |
| Deltex             | -    | Notch signaling | P     | Deltex over-expression + Notch reporter measurements                                                                                   | Jurkat T-cell line                                                                                                                | [53]             |
| E protein activity | -    | Gata3           | 2     | <i>In vitro</i> T-cell culture + mRNA expression analysis<br><br>mRNA expression analysis                                              | HEB <sup>-/-</sup> Rag1 <sup>-/-</sup> DN3 cells<br><br>E47 <sup>bm/bm</sup> thymocytes (bm – DNA-binding site mutation)          | [35]<br><br>[54] |
| E protein activity | +    | Gata3           | 1     | Analysis of Gata3 cis-regulatory element (WT/mutated E-protein binding site)                                                           | Jurkat T-cell line                                                                                                                | [55]             |
| E protein activity | +    | Gfi1            | 2     | E47 over-expression + mRNA expression analysis                                                                                         | 1F9 E2A <sup>-/-</sup> T-cell lymphoma line                                                                                       | [58]             |
| E protein activity | +    | Gfi1b           | 2     | E47 over-expression + mRNA expression analysis /<br>ChIP analysis using E2A antibody<br>E47 over-expression + mRNA expression analysis | E2A <sup>-/-</sup> T-cell lymphoma<br><br>E2A <sup>-/-</sup> Lin- BM cells (cultured)                                             | [56]<br><br>[57] |
| E protein activity | +    | HEBAIt          | 2     | Heb over-expression + mRNA expression analysis                                                                                         | P2C2 immature T-cell line                                                                                                         | [59]             |
| E protein activity | +    | Hes1            | 2     | E47 over-expression + mRNA expression analysis                                                                                         | E2A <sup>-/-</sup> Lin- BM cells (cultured)                                                                                       | [57]             |
| E protein activity | +    | IL-7R $\alpha$  | 2     | mRNA expression profiling<br><br>E47 over-expression + mRNA expression analysis                                                        | E2A <sup>-/-</sup> Lin-Sca1+Kit <sup>+</sup> Flt3 <sup>hi</sup> (LMPP)<br>E2A <sup>-/-</sup> Lin- BM cells (cultured)             | [60]<br><br>[57] |
| E protein activity | +    | Lat             | 2     | E47 over-expression + mRNA expression analysis                                                                                         | E2A <sup>-/-</sup> Lin- BM cells (cultured)                                                                                       | [57]             |
| E protein activity | +    | Notch1          | 3     | mRNA expression profiling<br><br>ChIP analysis using E2A antibody<br>E47 over-expression + Notch1 promoter activity measurements       | E2A <sup>-/-</sup> Lin-Sca1+Kit <sup>+</sup> Flt3 <sup>hi</sup> (LMPP)<br>Rag2 <sup>-/-</sup> DN3 thymocytes<br>NIH-3T3 cell line | [60]<br><br>[61] |
| E protein activity | +    | Notch3          | 2     | E47 over-expression + mRNA expression analysis                                                                                         | E2A <sup>-/-</sup> Lin- BM cells (cultured)                                                                                       | [57]             |
| E protein activity | +    | pTa             | 3     | E47 over-expression + mRNA expression analysis                                                                                         | E2A <sup>-/-</sup> Lin- BM cells (cultured)                                                                                       | [57]             |
| E protein activity | +    | Rag-1           | 2     | mRNA expression profiling                                                                                                              | E2A <sup>-/-</sup> Lin-Sca1+Kit <sup>+</sup> Flt3 <sup>hi</sup>                                                                   | [60]             |

|            |   |                |   |                                                                                          |                                                            |      |
|------------|---|----------------|---|------------------------------------------------------------------------------------------|------------------------------------------------------------|------|
|            |   |                |   |                                                                                          | (LMPP)                                                     |      |
| Scl/Lyl1/E | + | Id3            | 1 | Lyl1 over-expression + mRNA expression analysis                                          | human AML cells                                            | [62] |
| Scl/Lyl1/E | + | Hhex           | 1 | Analysis of Hhex enhancer containing Scl sites                                           | 416B progenitor cell line                                  | [63] |
| Scl/Lyl1/E | + | Kit            | 1 | Chip-Seq using Scl antibody on putative enhancer                                         | HPC-7 progenitor cell line                                 | [64] |
| Scl/Lyl1/E | + | Kit            | 1 | mRNA expression analysis                                                                 | immature B-cells (B220+) from wildtype/SCL transgenic mice | [65] |
| Scl/Lyl1/E | - | pTa            | 2 | mRNA expression analysis<br>Scl over-expression + pT $\alpha$ enhancer activity analysis | Scl-Lmo1 transgenic mice<br>AD10.1 immature T-cell line    | [66] |
| Scl/Lyl1/E | + | Runx1          | 1 | Scl over-expression + mRNA expression profiling<br>ChIP analysis using Scl antibody      | SCL-/- yolk sac cell line<br>yolk sac / FL                 | [67] |
| Scl/Lyl1/E | + | Runx3          | 1 | Scl over-expression + mRNA expression profiling<br>ChIP analysis using Scl antibody      | SCL-/- yolk sac cell line<br>yolk sac / FL                 | [67] |
| Ets1       | + | TCR $\beta$    | 2 | Ets1 over-expression + analysis of TCR $\beta$ enhancer activity                         | p19 cell line                                              | [68] |
| Gata3      | - | CEBPa          | 2 | Gata3 over-expression + mRNA expression analysis                                         | Bcl2-transgenic thymocytes                                 | [69] |
| Gata3      | + | Cpa3           | 3 | Gata3 over-expression + mRNA expression analysis                                         | Bcl2-transgenic thymocytes                                 | [69] |
| Gata3      | + | Deltex         | 1 | Gata3 over-expression + mRNA expression analysis                                         | adult DN1 thymocytes                                       | [70] |
| Gata3      | + | Gfi1b          | 2 | Gata3 over-expression + mRNA expression analysis                                         | Bcl2-transgenic thymocytes                                 | [69] |
| Gata3      | - | IL-7R $\alpha$ | 2 | Gata3 over-expression + mRNA expression analysis                                         | Bcl2-transgenic thymocytes                                 | [69] |
| Gata3      | + | Kit            | 2 | Gata3 over-expression + mRNA expression analysis                                         | Bcl2-transgenic thymocytes                                 | [69] |
| Gata3      | - | Lef1           | 2 | Gata3 over-expression + mRNA expression analysis                                         | Bcl2-transgenic thymocytes                                 | [69] |
| Gata3      | + | Notch3         | 2 | Gata3 over-expression + mRNA expression analysis                                         | Bcl2-transgenic thymocytes                                 | [69] |
| Gata3      | - | pTa            | 2 | Gata3 over-expression + mRNA expression analysis                                         | Bcl2-transgenic thymocytes                                 | [69] |
| Gata3      | - | PU.1           | 2 | Gata3 over-expression + mRNA expression analysis                                         | Bcl2-transgenic thymocytes                                 | [69] |
| Gata3      | - | Rag-1          | 2 | Gata3 over-expression + mRNA expression analysis                                         | Bcl2-transgenic thymocytes                                 | [69] |
| Gata3      | + | Scl/Tal1       | 2 | Gata3 over-expression + mRNA expression analysis                                         | Bcl2-transgenic thymocytes                                 | [69] |
| Gata3      | - | TCF-1          | 2 | Gata3 over-expression + mRNA expression analysis                                         | Bcl2-transgenic thymocytes                                 | [69] |
| Gata3      | + | TCR $\beta$    | 2 | Measurement of TCR $\beta$ enhancer activity (wildtype/mutated GATA binding site)        | p5424 T-cell line                                          | [71] |
| Gfi1       | + | Lmo2           | 1 | Gfi1 knockdown + <i>in situ</i> RNA hybridization                                        | Zebrafish embryos                                          | [72] |
| Gfi1       | - | PU.1           | 3 | mRNA expression analysis; ChIP analysis using Gfi1 antibody                              | Gfi1-/- Lin-Sca1+Kit+ (LSK) cells                          | [42] |
| Gfi1       | - | PU.1           | 3 | Gfi1 over-expression/knockdown + <i>in situ</i> RNA hybridization                        | Zebrafish embryos                                          | [72] |
| Gfi1       | + | Rag-1          | 1 | Gfi1 knockdown + <i>in situ</i> RNA hybridization                                        | Zebrafish embryos                                          | [72] |
| Gfi1       | + | Scl/Tal1       | 1 | Gfi1 knockdown + <i>in situ</i> RNA hybridization                                        | Zebrafish embryos                                          | [72] |
| Gfi1b      | + | Bcl11b         | 1 | Gfi1b knockdown + mRNA expression profiling                                              | K562 myeloid leukemic line                                 | [73] |
| Gfi1b      | - | Gata3          | 2 | Gfi1b over-expression + mRNA expression analysis                                         | E2A-/- T-cell lymphoma                                     | [56] |

|                 |   |         |   |                                                                                                                                                                                           |                                                                                                   |                                      |
|-----------------|---|---------|---|-------------------------------------------------------------------------------------------------------------------------------------------------------------------------------------------|---------------------------------------------------------------------------------------------------|--------------------------------------|
| Gfi1b           | - | Gfi1    | 2 | Gfi1b over-expression + mRNA expression analysis<br>mRNA expression analysis                                                                                                              | E2A <sup>-/-</sup> T-cell lymphoma<br>Gfi1b transgenic thymocytes                                 | [56]<br>[74]                         |
| Ikaros          | - | Gfi1    | 2 | Analysis of Gfi1-GFP reporter expression by flow cytometry                                                                                                                                | Ikaros <sup>-/-</sup> Lin-Sca1+Kit <sup>+</sup> (LSK) cells with Gfi1-GFP reporter                | [42]                                 |
| Ikaros          | - | PU.1    | 2 | mRNA expression analysis                                                                                                                                                                  | Ikaros <sup>-/-</sup> Lin-Sca1+Kit <sup>+</sup> (LSK) cells                                       | [42]                                 |
| Ikaros          | - | Runx1   | 2 | mRNA expression analysis                                                                                                                                                                  | Ikaros <sup>-/-</sup> adult DN thymocytes                                                         | [75]                                 |
| IL-7R/Stat      | - | Bcl11b  | 2 | <i>In vitro</i> T-cell culture + IL7 drop + mRNA expression analysis                                                                                                                      | FL Lin-Sca1+Kit <sup>+</sup> (LSK) cells                                                          | [28]                                 |
| IL-7R/Stat      | + | CEBPa   | 2 | <i>In vitro</i> T-cell culture + IL7 drop + mRNA expression analysis                                                                                                                      | FL Lin-Sca1+Kit <sup>+</sup> (LSK) cells                                                          | [28]                                 |
| IL-7R/Stat      | + | Ebf1    | 1 | constitutive IL7 signaling activation + mRNA expression analysis                                                                                                                          | IL-7R $\alpha$ <sup>-/-</sup> pre-pro B-cells                                                     | [76]                                 |
| IL-7R/Stat      | + | GATA3   | 1 | Flow cytometry with intracellular staining using GATA3 antibody<br>ChIP with Stat5 antibody                                                                                               | Stat5 <sup>-/-</sup> Th2 cells (n.b. cells were stimulated with IL-2 and IL-33)                   | [113]                                |
| IL-7R/Stat      | + | Kit     | 2 | <i>In vitro</i> T-cell culture + IL7 drop + mRNA expression analysis                                                                                                                      | FL Lin-Sca1+Kit <sup>+</sup> (LSK) cells                                                          | [28]                                 |
| IL-7R/Stat      | - | Lck     | 2 | <i>In vitro</i> T-cell culture + IL7 drop + analysis of Lck reporter                                                                                                                      | FL Lin-Sca1+Kit <sup>+</sup> (LSK) cells                                                          | [28]                                 |
| IL-7R/Stat      | - | Lef1    | 2 | IL-7 stimulation + mRNA expression analysis                                                                                                                                               | IL-7R $\alpha$ transgenic immature thymocytes                                                     | [77]                                 |
| IL-7R/Stat      | - | pTa     | 2 | <i>In vitro</i> T-cell culture + IL7 drop + mRNA expression analysis                                                                                                                      | FL Lin-Sca1+Kit <sup>+</sup> (LSK) cells                                                          | [28]                                 |
| IL-7R/Stat      | + | PU.1    | 2 | <i>In vitro</i> T-cell culture + IL7 drop + mRNA expression analysis                                                                                                                      | FL Lin-Sca1+Kit <sup>+</sup> (LSK) cells                                                          | [28]                                 |
| IL-7R/Stat      | - | TCF-1   | 2 | <i>In vitro</i> T-cell culture + IL7 drop + mRNA expression analysis<br>IL-7 stimulation + mRNA expression analysis                                                                       | FL Lin-Sca1+Kit <sup>+</sup> (LSK) cells<br>IL-7R $\alpha$ transgenic immature thymocytes         | [28]<br>[77]                         |
| Lmo2            | + | E2A/Scl | P | EMSA assay using Lmo2 and Tal1 antibody                                                                                                                                                   | Lmo transgenic immature T-cell line                                                               | [78]                                 |
| Lmo2            | + | Hhex    | 2 | mRNA expression analysis                                                                                                                                                                  | Lmo transgenic DN3 leukemic cells                                                                 | [79]                                 |
| Lmo2            | + | Kit     | 2 | mRNA expression analysis                                                                                                                                                                  | Lmo transgenic DN3 leukemic cells                                                                 | [79]                                 |
| Lmo2            | + | Lyl1    | 2 | mRNA expression analysis                                                                                                                                                                  | Lmo transgenic DN3 leukemic cells                                                                 | [79]                                 |
| Myb             | + | Gata3   | 1 | dominant negative Myb over-expression + mRNA expression analysis                                                                                                                          | E16 cell line                                                                                     | [80]                                 |
| Notch signaling | + | Bcl11b  | 3 | <i>In vitro</i> culture (+/-DL1) + mRNA expression analysis<br>ChIP analysis using CSL antibody                                                                                           | Thy1 <sup>+</sup> fetal thymocytes<br>adult thymocytes                                            | [81]<br>[44]                         |
| Notch signaling | + | CD25    | 2 | <i>In vitro</i> culture (+/-DL1) + surface expression analysis using flow cytometry<br>surface expression analysis using flow cytometry                                                   | FL Lin-Kit <sup>+</sup> cells<br><br>DN3 thymocytes with inhibitor of Notch signaling (DNMAML)    | [15]<br><br>[82]                     |
| Notch signaling | + | CD3e    | 2 | <i>In vitro</i> culture (+/-DL1) + mRNA expression analysis                                                                                                                               | Bcl2-transgenic thymocytes                                                                        | [69]                                 |
| Notch signaling | + | CD3g    | 2 | <i>In vitro</i> culture (+/-DL1) + mRNA expression analysis                                                                                                                               | Bcl2-transgenic thymocytes                                                                        | [69]                                 |
| Notch signaling | - | CEBPa   |   | <i>In vitro</i> culture (+/-DL1) + mRNA expression analysis                                                                                                                               | Thy1 <sup>+</sup> fetal thymocytes                                                                | [81]                                 |
| Notch signaling | + | Deltex  | 3 | <i>In vitro</i> culture (+/-DL1) + mRNA expression analysis<br><i>In vitro</i> culture (+/-DL1) + mRNA expression analysis<br><i>In vitro</i> culture (+/-DL1) + mRNA expression analysis | FL Lin-Kit <sup>+</sup> cells<br>Thy1 <sup>+</sup> fetal thymocytes<br>Bcl2-transgenic thymocytes | [15]<br>[81]<br>[69]<br>many earlier |

|                 |   |                 |   |                                                                                                                                                                                                     |                                                                           | references                      |
|-----------------|---|-----------------|---|-----------------------------------------------------------------------------------------------------------------------------------------------------------------------------------------------------|---------------------------------------------------------------------------|---------------------------------|
| Notch signaling | + | E2A (weak)      | 2 | <i>In vitro</i> culture (+/-DL1) + mRNA expression analysis                                                                                                                                         | Bcl2-transgenic thymocytes                                                | [69]                            |
| Notch signaling | - | Ebf1            | 2 | <i>In vitro</i> culture (+/-DL1) + mRNA expression analysis                                                                                                                                         | FL Lin-Kit+ cells                                                         | [15]                            |
| Notch signaling | + | Gata3           | 2 | <i>In vitro</i> culture (+/-DL1) + mRNA expression analysis<br>(connection absent in humans)                                                                                                        | FL Lin-Kit+ cells                                                         | [15]<br>[114, 115]              |
| Notch signaling | + | Gfi1b           | 2 | <i>In vitro</i> culture (+/-DL1) + mRNA expression analysis                                                                                                                                         | Bcl2-transgenic thymocytes                                                | [69]                            |
| Notch signaling | + | HEBAIt          | 2 | <i>In vitro</i> culture (+/-DL1) + mRNA expression analysis                                                                                                                                         | Thy1+ fetal thymocytes                                                    | [81]                            |
| Notch signaling | + | Hes1            | 2 | <i>In vitro</i> culture (+/-DL1) + mRNA expression analysis                                                                                                                                         | FL Lin-Kit+ cells                                                         | [15]<br>many earlier references |
| Notch signaling | - | Id3             | 2 | <i>In vitro</i> culture (+/-DL1) + mRNA expression analysis<br><i>In vitro</i> culture (+/-DL1) + mRNA expression analysis                                                                          | Thy1+ fetal thymocytes<br>Bcl2-transgenic thymocytes                      | [81]<br>[69]                    |
| Notch signaling | + | IL-7R $\alpha$  | 3 | Notch ICN over-expression + <i>in vitro</i> culture + surface expression analysis by flow<br>Notch ICN over-expression + analysis of IL-7R $\alpha$ promoter activity                               | DN1 thymocytes<br>293T and Jurkat cell lines                              | [83]                            |
| Notch signaling | + | Lat             | 2 | <i>In vitro</i> culture (+/-DL1) + mRNA expression analysis                                                                                                                                         | Bcl2-transgenic thymocytes                                                | [69]                            |
| Notch signaling | + | Lck             | 2 | <i>In vitro</i> culture (+/-DL1) + mRNA expression analysis                                                                                                                                         | Bcl2-transgenic thymocytes                                                | [69]                            |
| Notch signaling | + | Lef1            | 2 | <i>In vitro</i> culture (+/-DL1) + mRNA expression analysis                                                                                                                                         | Bcl2-transgenic thymocytes                                                | [69]                            |
| Notch signaling | + | Notch1          | 2 | <i>In vitro</i> culture (+/-DL1) + mRNA expression analysis<br>ChIP using CSL antibody<br>Analysis of Notch 1 reporter construct                                                                    | Bcl2-transgenic thymocytes<br>Rag2-/- thymocytes<br>NIH-3T3 cell line     | [69]<br>[61]                    |
| Notch signaling | + | Notch3          | 2 | <i>In vitro</i> culture (+/-DL1) + mRNA expression analysis                                                                                                                                         | Bcl2-transgenic thymocytes                                                | [69]                            |
| Notch signaling | + | Nrarp           | 2 | Notch IC over-expression + mRNA expression analysis<br>Notch IC over-expression + analysis of Nrarp promoter activity                                                                               | AKR1010 T-cell line<br>293T cells                                         | [84]<br>[85]                    |
| Notch signaling | + | pTa             | 3 | Notch ICD over-expression + analysis of pT $\alpha$ enhancer activity<br><i>In vitro</i> culture (+/-DL1) + mRNA expression analysis<br><i>In vitro</i> culture (+/-DL1) + mRNA expression analysis | 293 cell line<br>Thy1+ fetal thymocytes<br>Bcl2-transgenic thymocytes     | [86]<br>[81]<br>[69]            |
| Notch signaling | + | Rag-1           | 2 | <i>In vitro</i> culture (+/-DL1) + mRNA expression analysis                                                                                                                                         | Bcl2-transgenic thymocytes                                                | [69]                            |
| Notch signaling | + | Runx1           | 3 | <i>In vitro</i> culture (+/-DL1) + mRNA expression analysis<br><i>In vitro</i> culture (+/-DL1) + mRNA expression analysis<br>Notch1 over-expression + mRNA expression analysis                     | Thy1+ fetal thymocytes<br>Bcl2-transgenic thymocytes<br>NIH-3T3 cell line | [81]<br>[69]<br>[87]            |
| Notch signaling | + | TCF-1           | 2 | <i>In vitro</i> culture (+/-DL1) + mRNA expression analysis                                                                                                                                         | FL Lin-Kit+CD27+ progenitors<br>Lin-cKit+Sca1+ (LSK) cells                | [100]<br>[45]                   |
| Nrarp           | - | Notch signaling | P | Nrarp over-expression + mRNA expression analysis of Notch responsive genes                                                                                                                          | AKR1010 T-cell line                                                       | [88]                            |
| PU.1            | + | Bcl11a          | 2 | PU.1 over-expression + mRNA expression analysis                                                                                                                                                     | Thy1+ fetal thymocytes                                                    | [81]                            |
| PU.1            | - | Bcl11b          | 2 | PU.1 over-expression + mRNA expression analysis                                                                                                                                                     | Thy1+ fetal thymocytes                                                    | [81]                            |
| PU.1            | - | CD3e            | 2 | PU.1 over-expression + mRNA                                                                                                                                                                         | Thy1+ fetal                                                               | [81]                            |

|       |   |                |   |                                                                                                                                                      |                                                                                         |               |
|-------|---|----------------|---|------------------------------------------------------------------------------------------------------------------------------------------------------|-----------------------------------------------------------------------------------------|---------------|
|       |   |                |   | expression analysis                                                                                                                                  | thymocytes                                                                              |               |
| PU.1  | - | CD3g           | 2 | PU.1 over-expression + mRNA expression analysis                                                                                                      | Thy1+ fetal thymocytes                                                                  | [81]          |
| PU.1  | - | E2A            | 2 | PU.1 over-expression + mRNA expression analysis                                                                                                      | Thy1+ fetal thymocytes                                                                  | [81]          |
| PU.1  | - | Ets1           | 2 | PU.1 over-expression + mRNA expression analysis                                                                                                      | Thy1+ fetal thymocytes                                                                  | [81]          |
| PU.1  | - | Gata3 activity | P | ChIP using Gata3 antibody                                                                                                                            | PU.1-/- CD4+ T-cells                                                                    | [89]          |
| PU.1  | - | Gfi1           | 2 | PU.1 over-expression + mRNA expression analysis                                                                                                      | Thy1+ fetal thymocytes                                                                  | [81]          |
| PU.1  | - | HEB            | 2 | PU.1 over-expression + mRNA expression analysis                                                                                                      | Thy1+ fetal thymocytes                                                                  | [81]          |
| PU.1  | - | HEBAIt         | 2 | PU.1 over-expression + mRNA expression analysis                                                                                                      | Thy1+ fetal thymocytes                                                                  | [81]          |
| PU.1  | - | Hes1           | 2 | PU.1 over-expression + mRNA expression analysis                                                                                                      | Thy1+ fetal thymocytes                                                                  | [81]          |
| PU.1  | + | Id2            | 2 | PU.1 over-expression + mRNA expression analysis                                                                                                      | Thy1+ fetal thymocytes                                                                  | [81]          |
| PU.1  | - | Id3            | 2 | PU.1 over-expression + mRNA expression analysis                                                                                                      | Thy1+ fetal thymocytes                                                                  | [81]          |
| PU.1  | - | Ikaros         | 2 | PU.1 over-expression + mRNA expression analysis                                                                                                      | Thy1+ fetal thymocytes                                                                  | [81]          |
| PU.1  | + | IL-7R $\alpha$ | 2 | mRNA expression analysis<br>ChIP using PU.1 antibody                                                                                                 | FL PU.1-/- FL cells<br>FL-derived pro-B cells                                           | [90]          |
| PU.1  | - | IL-7R $\alpha$ | 2 | PU.1 over-expression + mRNA expression analysis                                                                                                      | Thy1+ fetal thymocytes                                                                  | [81]          |
| PU.1  | - | Kit            | 2 | PU.1 over-expression + surface expression analysis by flow cytometry                                                                                 | Thy1+ fetal thymocytes                                                                  | [81]          |
| PU.1  | - | Lat            | 2 | PU.1 over-expression + mRNA expression analysis                                                                                                      | Thy1+ fetal thymocytes                                                                  | [81]          |
| PU.1  | - | Lck            | 2 | PU.1 over-expression + mRNA expression analysis                                                                                                      | Thy1+ fetal thymocytes                                                                  | [81]          |
| PU.1  | + | Lmo2           | 1 | PU.1 over-expression + Lmo2 promoter activity measurements<br>ChIP using PU.1 antibody                                                               | 293T cell line<br>416B myeloid cell line                                                | [91]          |
| PU.1  | + | Lyl1           | 1 | ChIP using PU.1 antibody<br>Lyl1 promoter activity measurements (WT/mutated PU.1 site)                                                               | 416B myeloid cell line                                                                  | [92]          |
| PU.1  | - | Myb            | 2 | PU.1 over-expression + mRNA expression analysis                                                                                                      | Thy1+ fetal thymocytes                                                                  | [81]          |
| PU.1  | + | PU.1           | 1 | transfection with PU.1 regulatory element construct (+/- mutation to PU.1 binding site) + analysis of reporter expression / ChIP using PU.1 antibody | 416B myeloid cell line                                                                  | [93]          |
| PU.1  | - | Rag-1          | 2 | PU.1 over-expression + mRNA expression analysis                                                                                                      | Thy1+ fetal thymocytes                                                                  | [81]          |
| PU.1  | - | Runx3          | 1 | PU.1 over-expression + mRNA expression analysis                                                                                                      | Thy1+ fetal thymocytes                                                                  | [81]          |
| PU.1  | - | TCF-1          | 2 | PU.1 over-expression + mRNA expression analysis                                                                                                      | Thy1+ fetal thymocytes                                                                  | [81]          |
| PU.1  | - | Zap70          | 2 | PU.1 over-expression + mRNA expression analysis                                                                                                      | Thy1+ fetal thymocytes                                                                  | [81]          |
| Runx1 | - | PU.1           | 3 | mRNA expression analysis<br><br>Runx1/Runx1 dominant negative over-expression + analysis of PU.1 cis-regulatory element                              | Runx1-/- DN2, DN3 thymocytes<br>P2C2 immature T-cell line +<br>Raw264 myeloid cell line | [109]<br>[94] |
| Runx1 | - | Rag-1          | 2 | Analysis of Rag1-GFP reporter expression by flow cytometry (wildtype/mutated Runx1 site)                                                             | Rag1 GFP-reporter transgenic DN thymocytes                                              | [95]          |
| Runx1 | + | TCR $\beta$    | 1 | Runx1 over-expression + analysis of TCR $\beta$ enhancer activity                                                                                    | p19 cell line                                                                           | [68]          |
| TCF-1 | - | PU.1           | 1 | Analysis of PU.1 cis-regulatory element (WT/mutated Tcf site)                                                                                        | EL4 T-cell line                                                                         | [96]          |

|       |   |        |   |                                                                                                     |                                                     |               |
|-------|---|--------|---|-----------------------------------------------------------------------------------------------------|-----------------------------------------------------|---------------|
| TCF-1 | + | Lef1   | 2 | Wnt pathway activation, ChiP using TCF antibody<br>TCF-1 over-expression + mRNA expression analysis | DLD1 cancer cell line<br>Lin-cKit+Sca1+ (LSK) cells | [102]<br>[45] |
| TCF-1 | + | TCF-1  | 3 | TCF-1 over-expression + mRNA expression analysis<br>ChIP analysis using TCF-1 antibody              | Lin-cKit+Sca1+ (LSK) cells                          | [45]          |
| TCF-1 | + | Bcl11b | 3 | TCF-1 over-expression + mRNA expression analysis<br>ChIP analysis using TCF-1 antibody              | Lin-cKit+Sca1+ (LSK) cells                          | [45]          |
| TCF-1 | + | GATA3  | 3 | TCF-1 over-expression + mRNA expression analysis<br>ChIP analysis using TCF-1 antibody<br>GATA3     | Lin-cKit+Sca1+ (LSK) cells<br>TCF-/- Th2 cells      | [45]<br>[116] |
| TCF-1 | + | CD25   | 3 | TCF-1 over-expression + mRNA expression analysis<br>ChIP analysis using TCF-1 antibody              | Lin-cKit+Sca1+ (LSK) cells                          | [45]          |
